# Supplementary material for: Solvatomorphism in a series of copper(II) complexes with the 5-phenyl­imidazole/perchlorate system as ligands
Source: PubMed Central journal article supplement (PMC11301897; doi:10.1107/s2052520624005948), 2024-07-30
Supplement: b-80-00347-sup13.pdf [file b-80-00347-sup13.pdf]

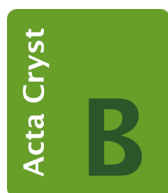

STRUCTURAL SCIENCE  
CRYSTAL ENGINEERING  
MATERIALS

**Volume 80 (2024)**

**Supporting information for article:**

**Solvatomorphism in a series of copper(II) complexes with the 5-phenylimidazole/perchlorate system as ligands**

**Edward Loukopoulos, Constantina Papatriantafyllopoulou, Eleni Moushi, Alexandros A. Kitos, Anastasios J. Tasiopoulos, Spyros P. Perlepes and Vassilios Nastopoulos**

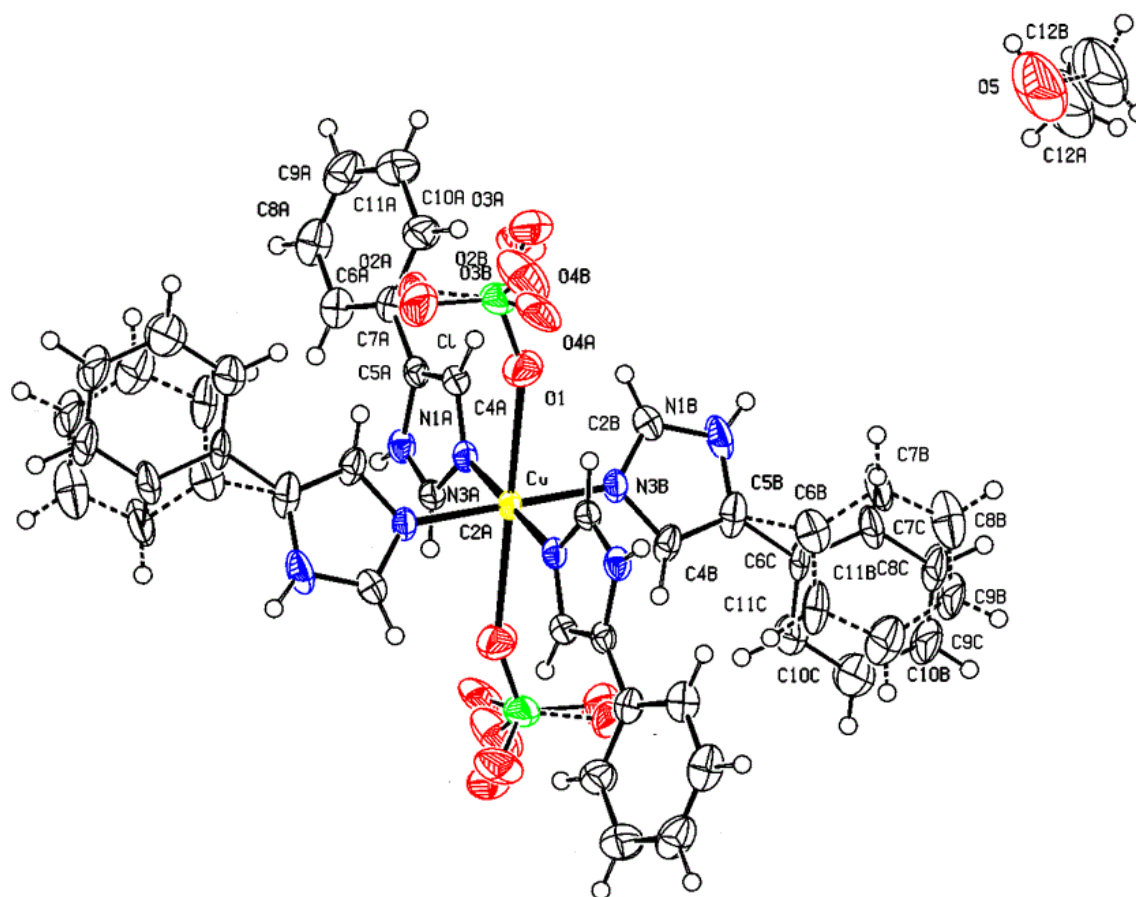

**Figure S1** A view of the structure of compound 2·2MeOH with atom labelling and displacement ellipsoids drawn at the 50% probability level. Atoms generated by symmetry through the inversion centre located on the copper ion are not labelled. Both orientations of the disordered phenyl rings, the ClO<sub>4</sub><sup>-</sup> ion and the MeOH solvent molecule are shown.

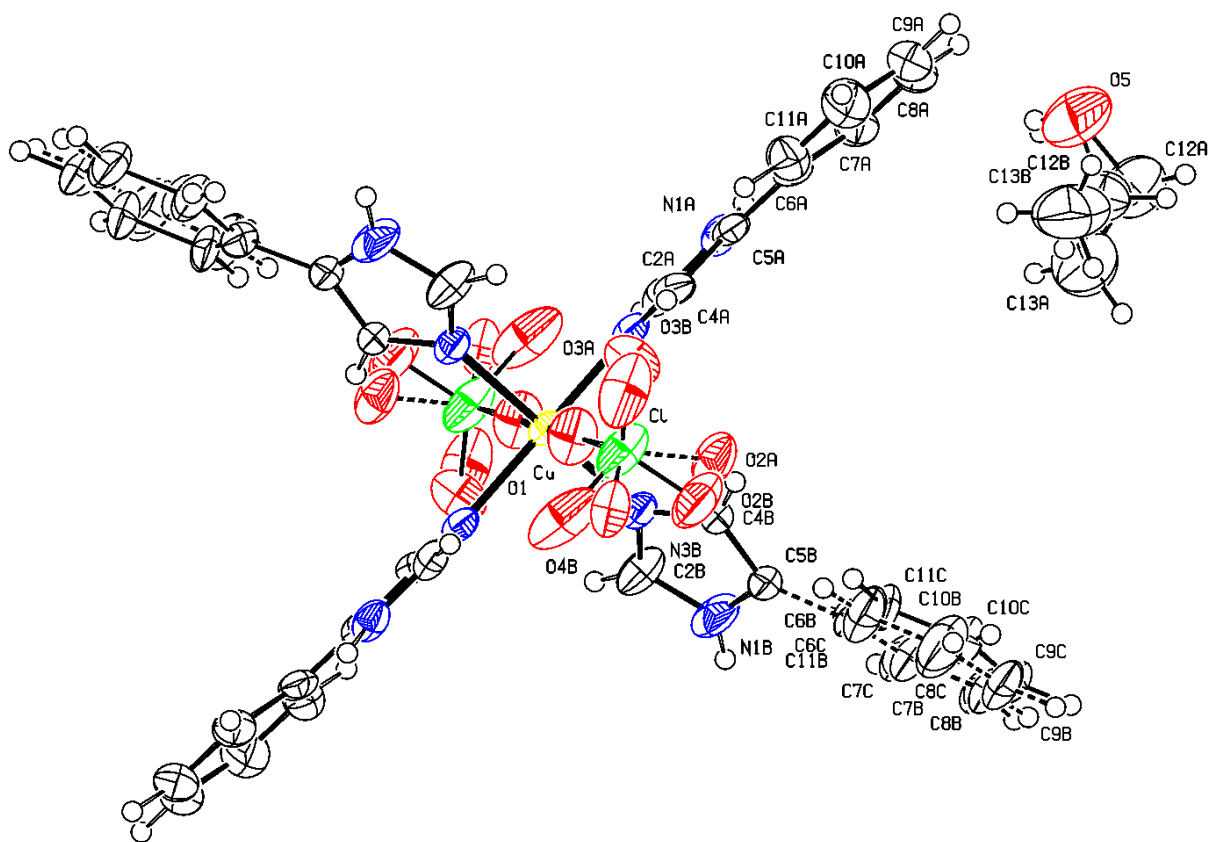

**Figure S2** A view of the structure of compound **3**·2EtOH with atom labelling and displacement ellipsoids drawn at the 50% probability level. Symmetry-related atoms through the inversion centre located on the copper ion site are not labelled. Both orientations of the disordered phenyl rings, the ClO<sub>4</sub><sup>-</sup> ion and the EtOH solvent molecule are shown.

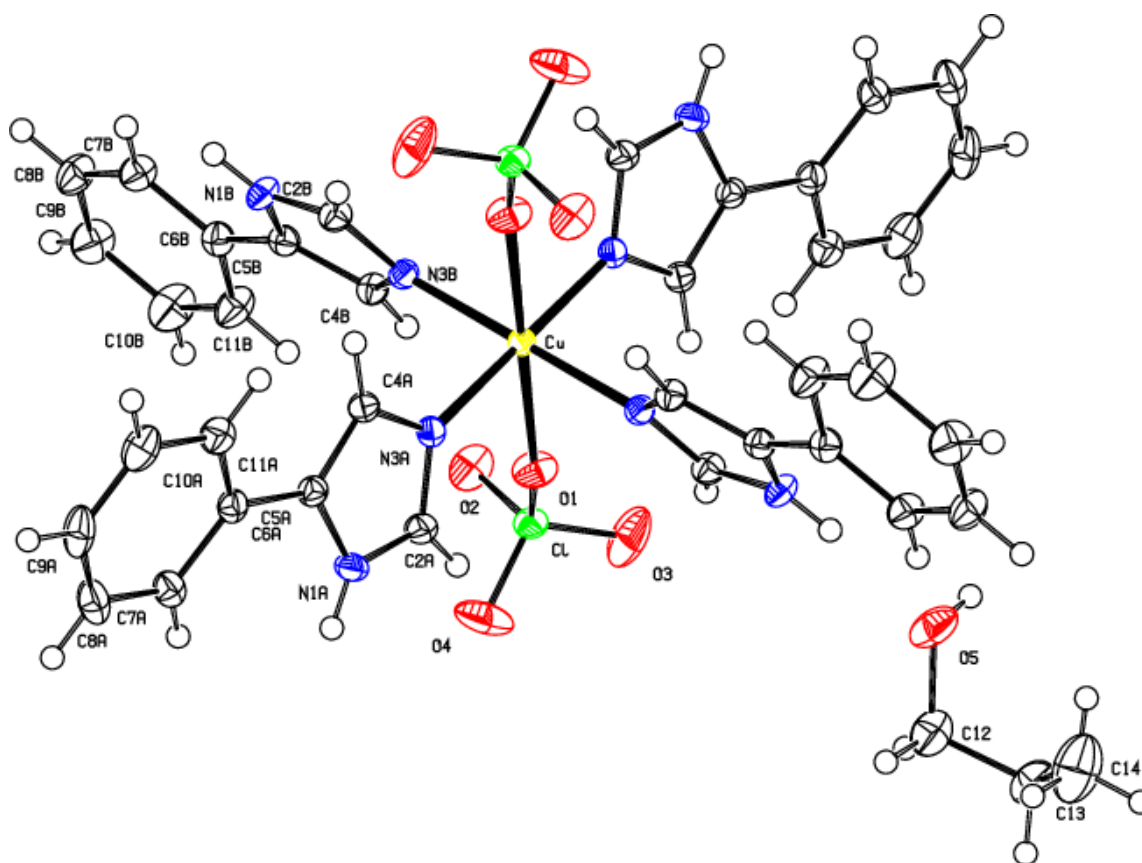

**Figure S3** A view of the structure of compound **4·2(1-PrOH)** with atom labelling and displacement ellipsoids drawn at the 50% probability level. Symmetry-related atoms through the inversion centre located on the copper ion site are not labelled.

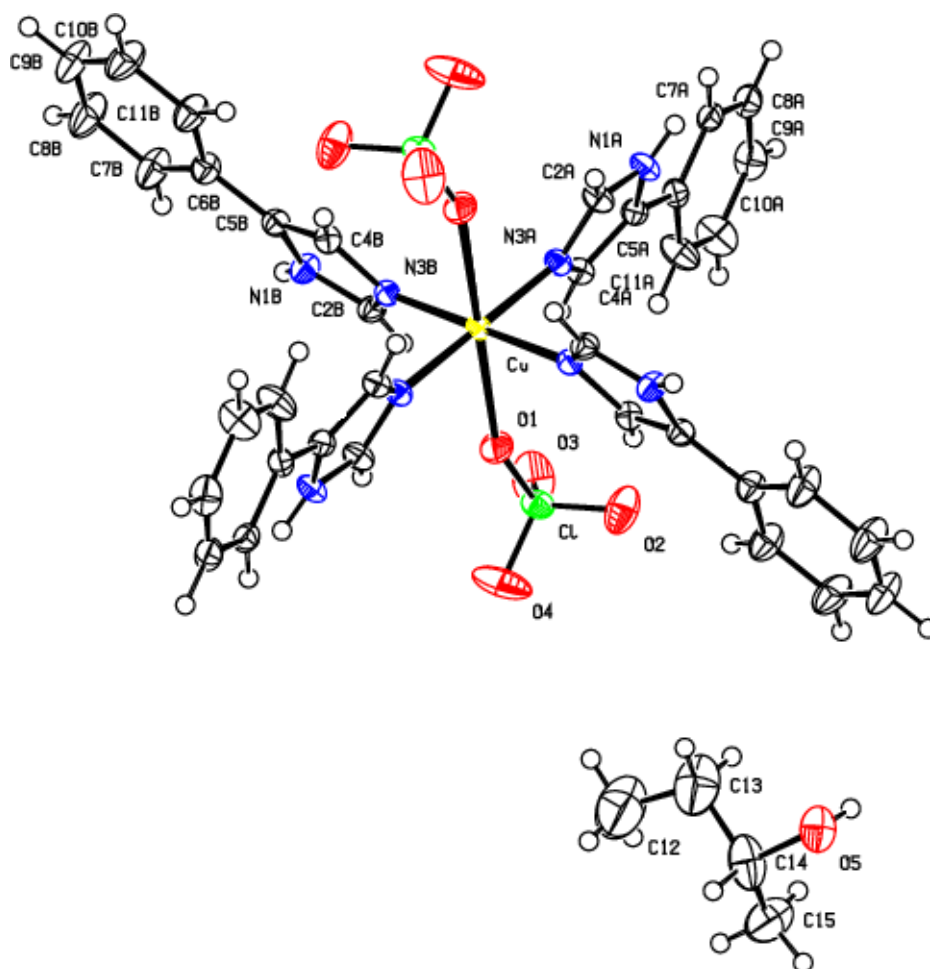

**Figure S4** A view of the structure of compound **6**·2(2-BuOH) with atom labelling and displacement ellipsoids drawn at the 50% probability level. Symmetry-related atoms through the inversion centre located on the copper atom site are not labelled.

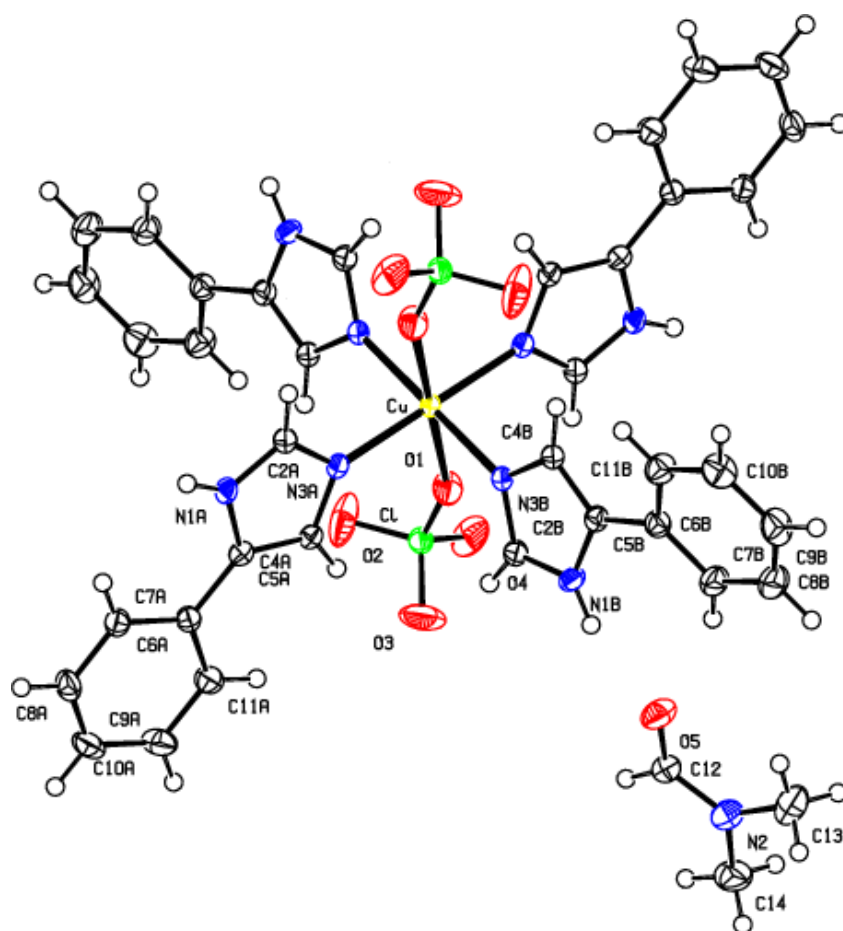

**Figure S5** A view of the structure of compound 7·2DMF with atom labelling and displacement ellipsoids drawn at the 50% probability level. Symmetry-related atoms through the inversion centre located on the copper ion site are not labelled.

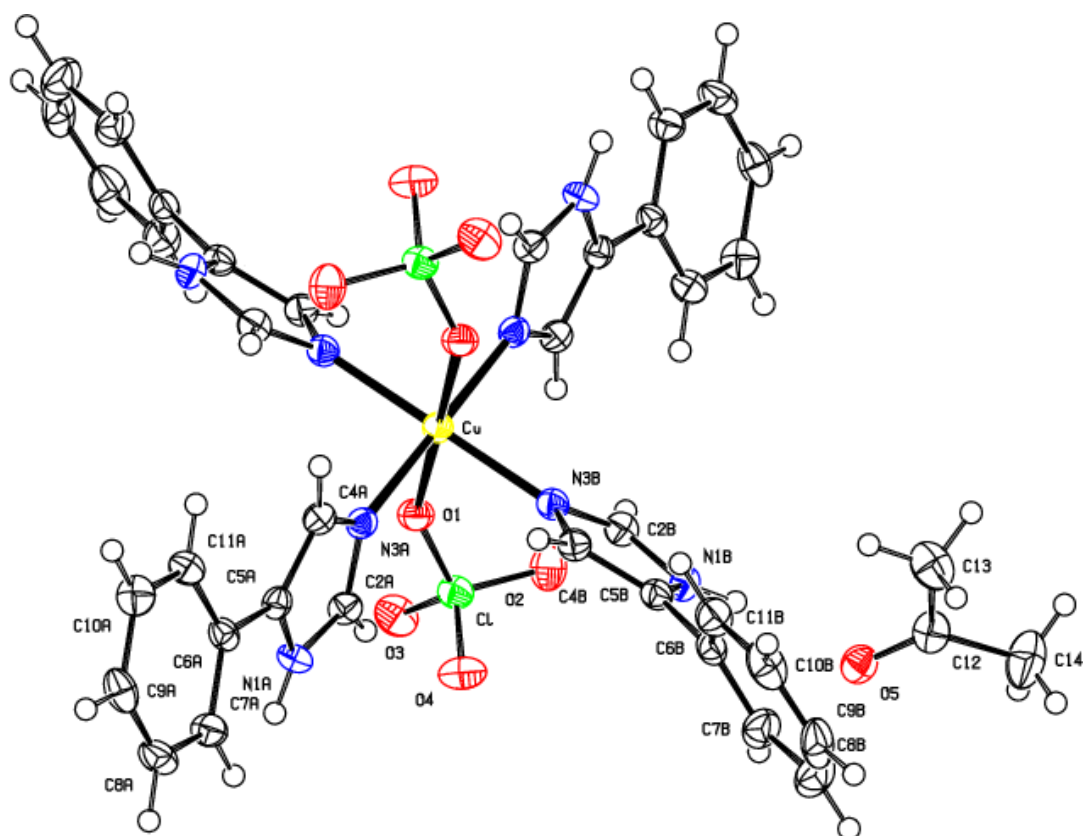

**Figure S6** A view of the structure of compound **8**·2Me<sub>2</sub>CO with atom labelling and displacement ellipsoids drawn at the 50% probability level. Symmetry-related atoms through the inversion centre located on the copper ion site are not labelled.





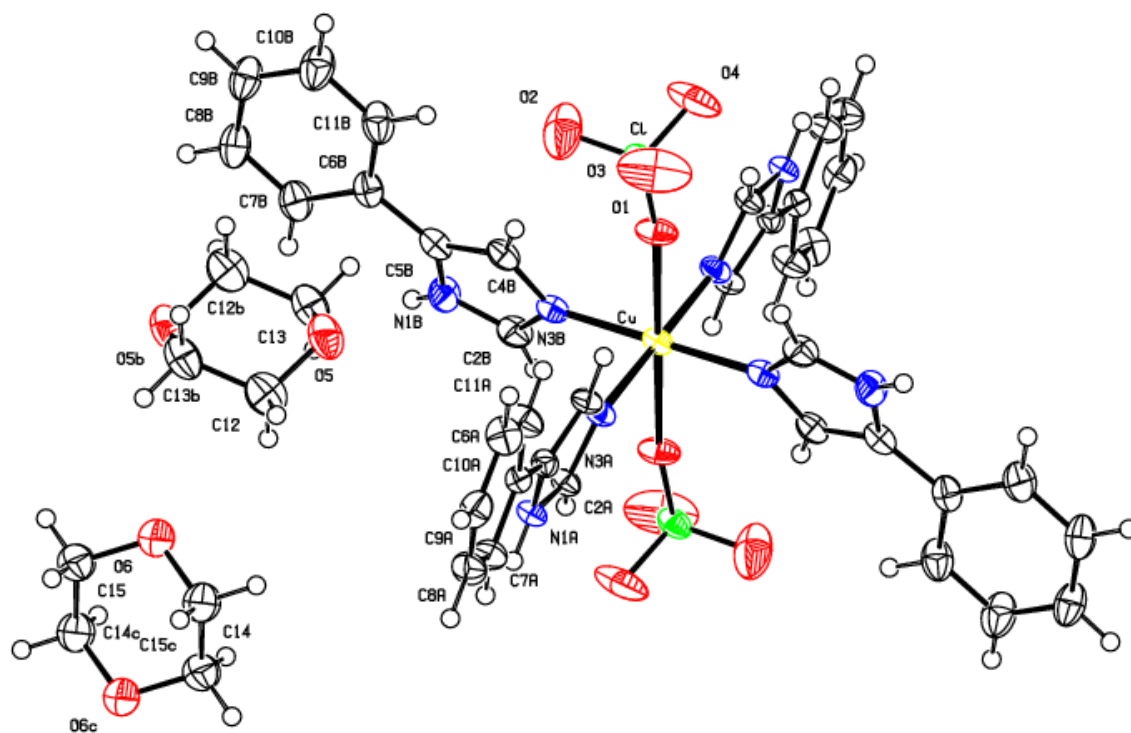

**Figure S8** A view of the structure of compound **10·2(1,4-dioxane)** with atom labelling and displacement ellipsoids drawn at the 50% probability level. Symmetry-related atoms through the inversion centre located on the copper ion site are not labelled.

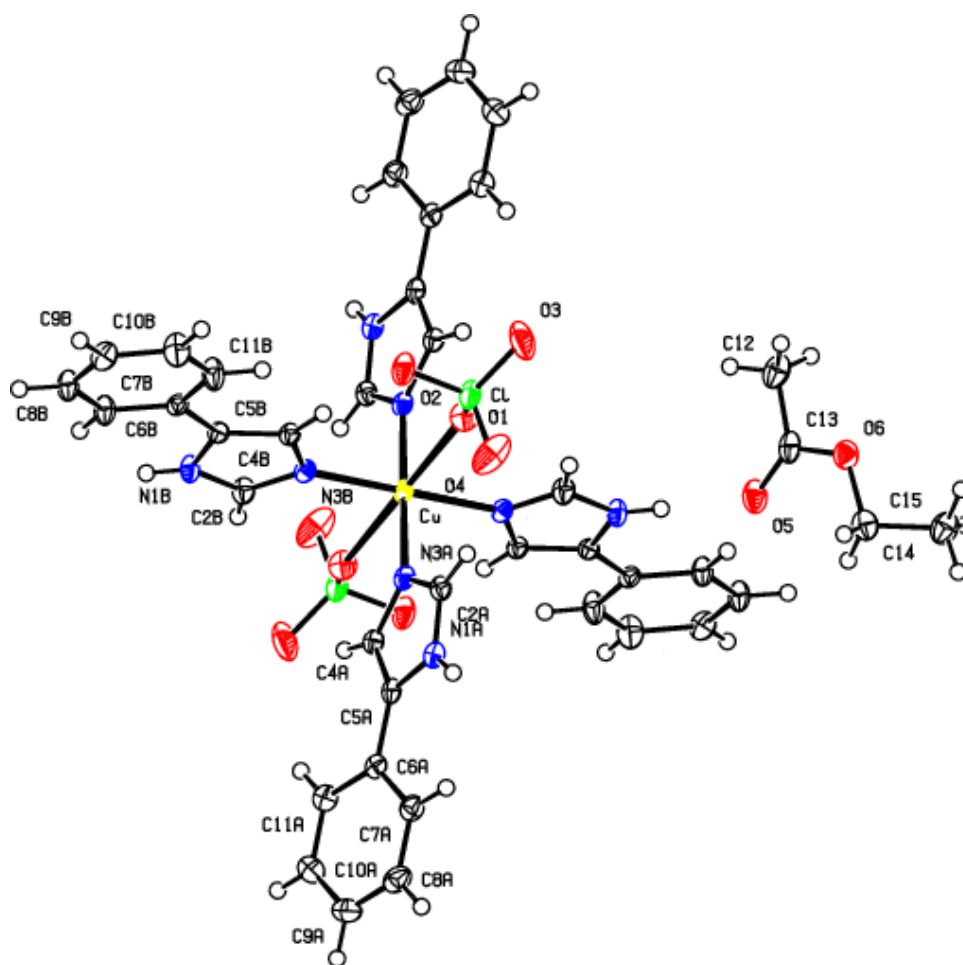

**Figure S9** A view of the structure of compound **11**·2EtOAc with atom labelling and displacement ellipsoids drawn at the 50% probability level. Symmetry-related atoms through the inversion centre located on the copper ion site are not labelled.

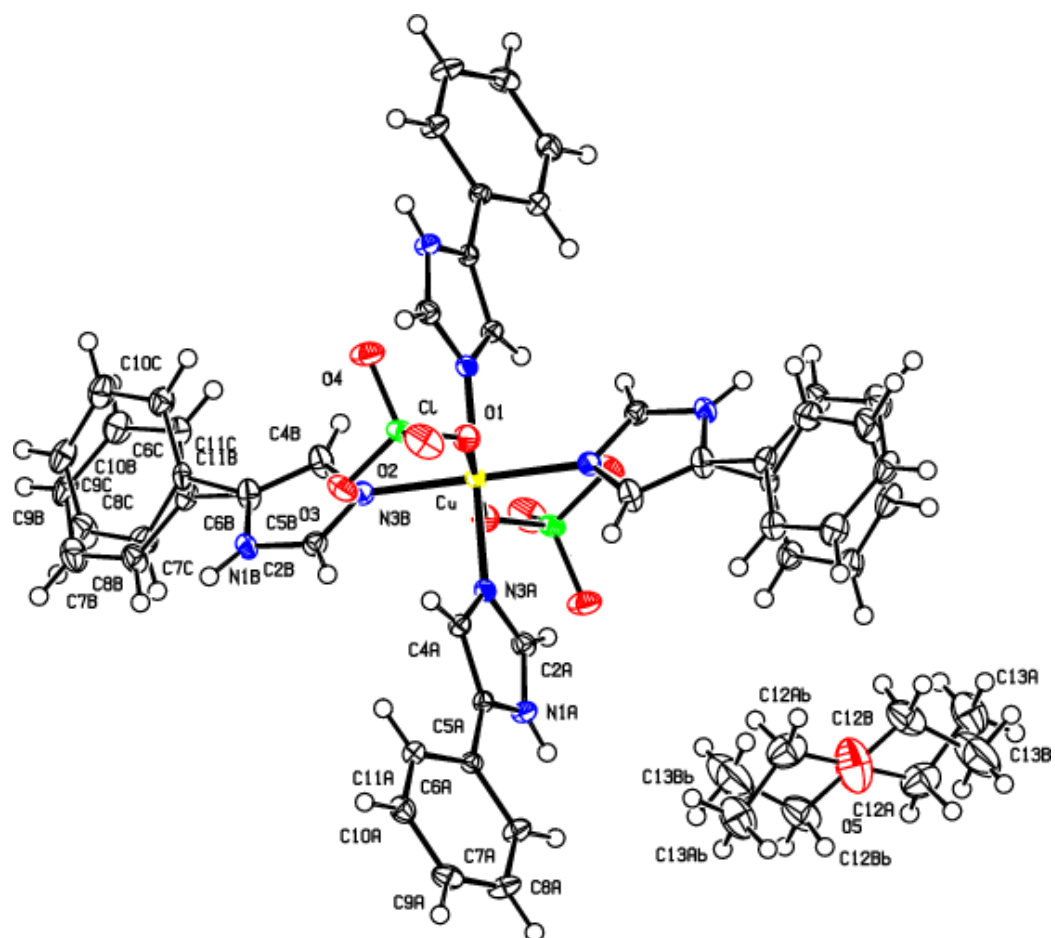

**Figure S10** A view of the structure of compound 12·Et<sub>2</sub>O with atom labelling and displacement ellipsoids drawn at the 50% probability level. Symmetry-related atoms through the inversion centre located on the copper ion site are not labelled. Both orientations of the disordered phenyl rings and the Et<sub>2</sub>O solvent molecule are shown.

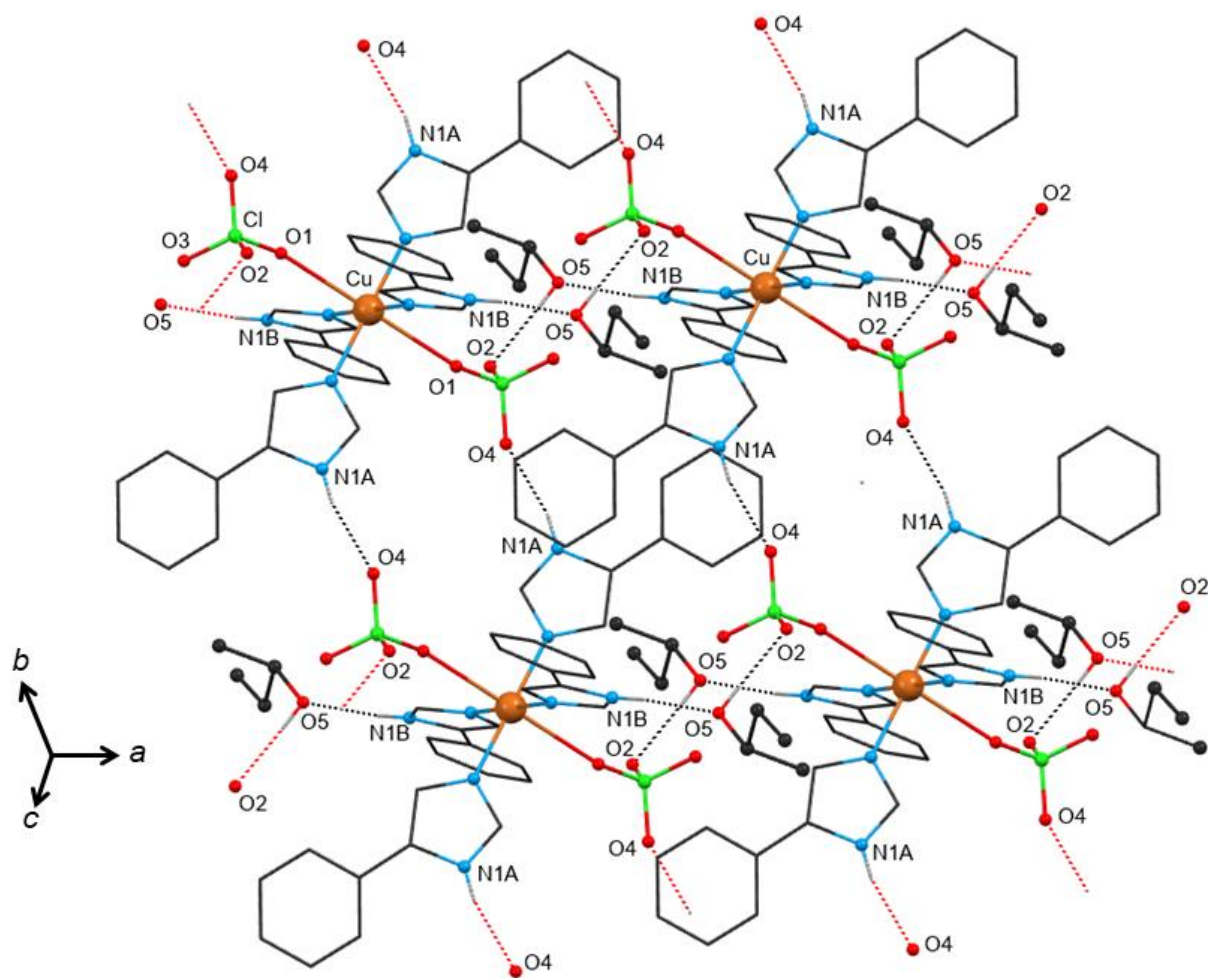

**Figure S11** View of a 2D layer of the crystal structure of solvatomorph **6**·2(2-BuOH) organized by hydrogen-bonding motifs (see Table 3). The atoms of the 2-BuOH solvent are drawn in ball-and-stick style (oxygen atom: O5). Only the H-atoms involved in strong intermolecular interactions are shown.

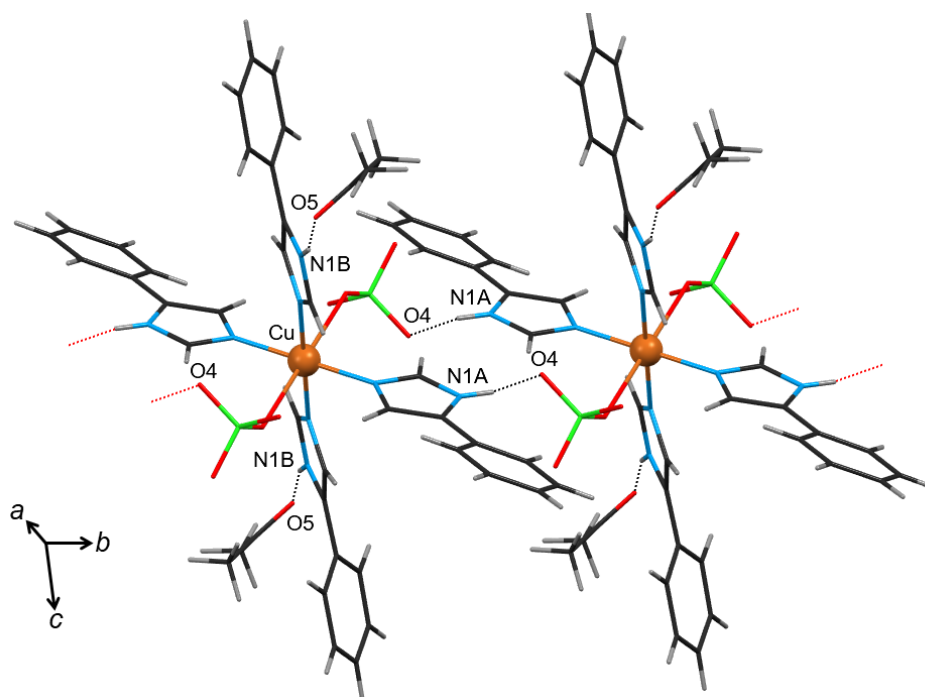

(a)

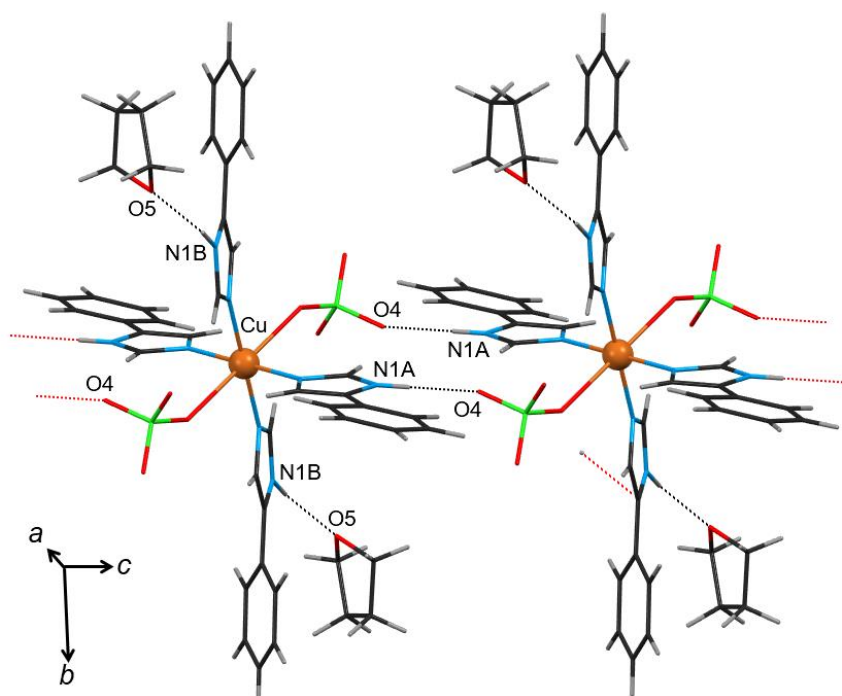

(b)

**Figure S12** 1D tapes in the crystal structure of (a) solvatomorph **8**·2Me<sub>2</sub>CO and (b) **9**·2THF formed by the [Cu(ClO<sub>4</sub>)<sub>2</sub>(LH)<sub>4</sub>] molecules *via* N1A–H1A···O4<sub>perchlorate</sub> synthons (see Table 3). The Me<sub>2</sub>CO and THF solvents (bearing the O5 atoms) are only terminally hydrogen-bonded to the host complexes.

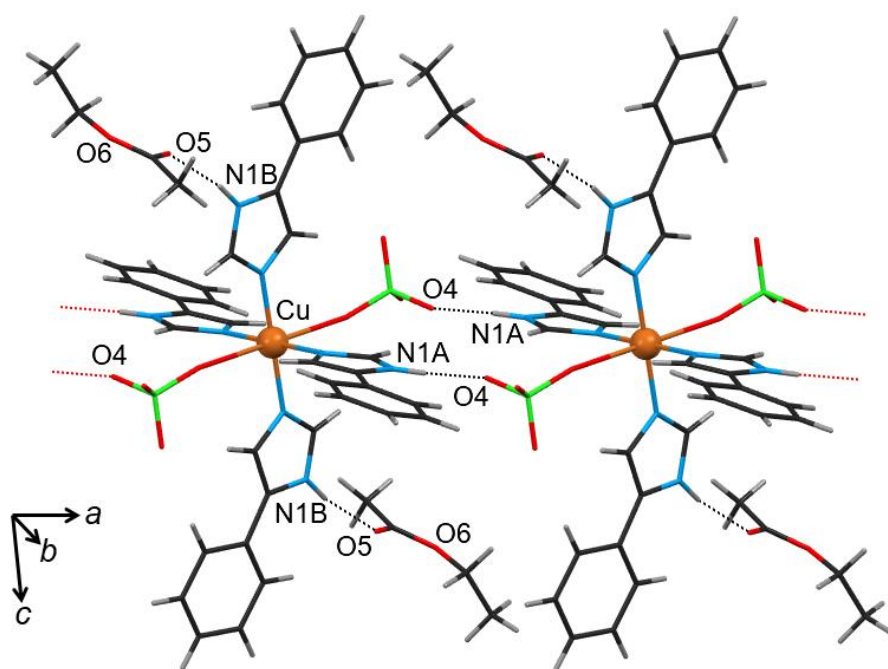

**Figure S13** 1D tapes in the crystal structure of solvatomorph **11**·2EtOAc formed by the  $[\text{Cu}(\text{ClO}_4)_2(\text{LH})_4]$  molecules *via*  $\text{N1A}-\text{H1A}\cdots\text{O4}_{\text{perchlorate}}$  synthons (see Table 3). The EtOAc solvent (bearing O5 and O6 atoms) is only terminally hydrogen-bonded to the host complexes.

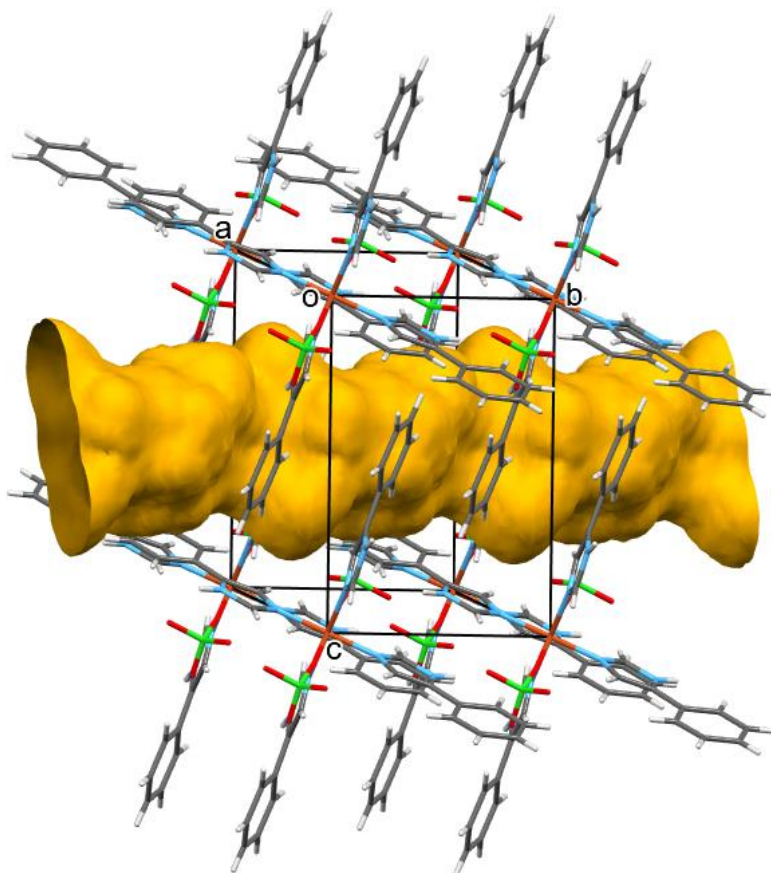

**Figure S14** View of the 3D structure of solvatomorph **10·2**(1,4-dioxane). The dioxane solvent molecules have been removed and the channels containing them along the *b*-axis of the unit cell are drawn in yellow.

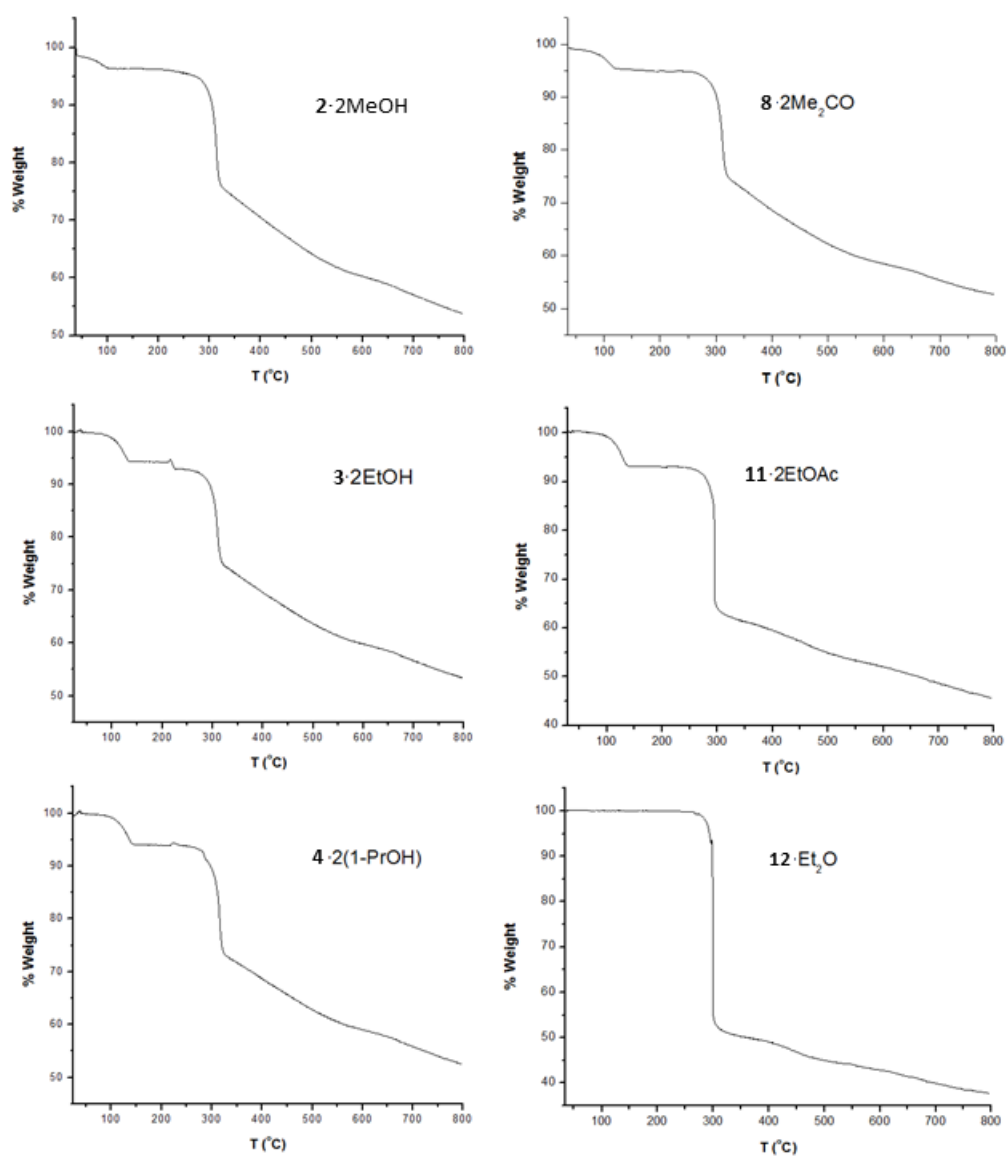

**Figure S15** TGA plots for selected complexes of this work.



**Table S1**  $\pi \cdots \pi$  stacking distances (Å) and angles ( $^\circ$ ) in complexes **1–4** and **6–12**.

| Structure | Rings involved <sup>a</sup> | Distance between ring centroids | Perpendicular distance between ring planes | Centroid offset | Dihedral angle between ring mean-planes |
|-----------|-----------------------------|---------------------------------|--------------------------------------------|-----------------|-----------------------------------------|
| <b>1</b>  | B2–B2 <sup>i</sup>          | 3.883(3)                        | 3.505(2)                                   | 1.671           | 0.0                                     |
|           | A1–A2 <sup>ii</sup>         | 3.862(2)                        | 3.158(2)                                   | 1.190           | 17.5(2)                                 |
| <b>2</b>  | A1–A2 <sup>iii</sup>        | 3.745(2)                        | 3.186(2)                                   | 1.194           | 13.8(2)                                 |
|           | B2–C2 <sup>iv</sup>         | 3.821(2)                        | 3.620(6)                                   | 0.963           | 6.3(6)                                  |
| <b>3</b>  | C2–C2 <sup>v</sup>          | 3.578(5)                        | 3.392(4)                                   | 1.137           | 0.0                                     |
|           | A1–B2 <sup>v</sup>          | 3.788(6)                        | 3.635(4)                                   | 0.877           | 7.1(5)                                  |
| <b>4</b>  | B2–B2 <sup>vi</sup>         | 4.059(2)                        | 3.636(1)                                   | 1.805           | 0.0                                     |
| <b>6</b>  | A1–A2 <sup>vii</sup>        | 3.938(2)                        | 2.946(2)                                   | 1.599           | 18.0(2)                                 |
|           | B2–B2 <sup>vi</sup>         | 3.993(2)                        | 3.595(2)                                   | 1.739           | 0.0                                     |
| <b>7</b>  | A1–A2 <sup>viii</sup>       | 3.666(2)                        | 3.331(8)                                   | 1.594           | 2.7(1)                                  |
|           | B2–B2 <sup>ix</sup>         | 4.033(2)                        | 3.634(1)                                   | 1.750           | 0.0                                     |
| <b>8</b>  | A2–A1 <sup>x</sup>          | 3.760(2)                        | 3.244(2)                                   | 0.856           | 18.4(2)                                 |
|           | A1–B2 <sup>xi</sup>         | 3.889(2)                        | 3.500(2)                                   | 1.694           | 0.02(2)                                 |
| <b>9</b>  | A2–A1 <sup>ix</sup>         | 3.685(3)                        | 3.090(2)                                   | 1.329           | 11.9(3)                                 |
| <b>10</b> | A1–A2 <sup>xii</sup>        | 3.866(2)                        | 3.032(2)                                   | 1.749           | 11.5(2)                                 |
| <b>11</b> | A2–A1 <sup>ix</sup>         | 3.597(2)                        | 3.191(1)                                   | 1.064           | 10.4(2)                                 |
|           | B2–B1 <sup>xiii</sup>       | 3.881(2)                        | 3.478(2)                                   | 1.534           | 6.5(2)                                  |
| <b>12</b> | A2–A1 <sup>v</sup>          | 3.953(2)                        | 3.266(2)                                   | 1.318           | 16.3(1)                                 |

<sup>a</sup> Ring A1: N1A to C5A; Ring A2: C6A to C11A; Ring B1: N1B to C5B; Ring B2: C6B to C11B; Ring C2: C6C to C11C.

Symmetry codes: (i)  $-x-1, -y, -z-1$ ; (ii)  $-x+1, -y+1, -z$ ; (iii)  $-x+1, -y-1, -z$ ; (iv)  $-x, -y, -z+1$ ; (v)  $-x, -y, -z$ ; (vi)  $-x-1, -y-1, -z-1$ ; (vii)  $-x-1, -y-1, -z$ ; (viii)  $-x+2, -y+2, -z+1$ ; (ix)  $-x+1, -y+1, -z+1$ ; (x)  $-x-1, -y+1, -z+1$ ; (xi)  $-x, -y+1, -z$ ; (xii)  $-x-1, -y+1, -z$ ; (xiii)  $-x+2, -y+1, -z+3$ .

**Table S2** C–H··· $\pi$  interaction parameters ( $\text{\AA}$ ,  $^\circ$ ) in compounds **1–4** and **6–12**.

| Structure | D–H···A <sup>a</sup>          | H···Cg <sup>b</sup> | H···(ring plane) <sup>c</sup> | $\gamma^d$ | C···Cg | X–H···Cg |
|-----------|-------------------------------|---------------------|-------------------------------|------------|--------|----------|
| <b>1</b>  | C8A–H8A···Cg1 <sup>i</sup>    | 2.82                | 2.75                          | 13.2       | 3.66   | 148      |
|           | C8B–H8B···Cg2 <sup>ii</sup>   | 2.97                | 2.87                          | 14.9       | 3.77   | 143      |
| <b>2</b>  | C8A–H8A···Cg1 <sup>iii</sup>  | 2.64                | 2.61                          | 7.9        | 3.49   | 151      |
|           | C9A–H9A···Cg3 <sup>iv</sup>   | 2.83                | 2.63                          | 21.5       | 3.68   | 150      |
| <b>3</b>  | C8A–H8A···Cg1 <sup>i</sup>    | 2.67                | 2.65                          | 7.0        | 3.54   | 153      |
|           | C9C–H9C···Cg3 <sup>v</sup>    | 2.77                | 2.66                          | 16.5       | 3.66   | 155      |
|           | C13A–H13A···Cg4 <sup>v</sup>  | 2.89                | 2.81                          | 13.4       | 3.48   | 120      |
| <b>4</b>  | C8A–H8A···Cg1 <sup>vi</sup>   | 2.67                | 2.63                          | 10.3       | 3.58   | 161      |
|           | C8B–H8B···Cg2 <sup>vii</sup>  | 2.73                | 2.70                          | 8.3        | 3.57   | 148      |
| <b>6</b>  | C8A–H8A···Cg1 <sup>i</sup>    | 2.69                | 2.65                          | 10.3       | 3.62   | 148      |
|           | C8B–H8B···Cg2 <sup>ii</sup>   | 2.89                | 2.75                          | 17.9       | 3.69   | 143      |
| <b>7</b>  | C8A–H8A···Cg1 <sup>viii</sup> | 2.67                | 2.65                          | 7.7        | 3.60   | 164      |
|           | C14–H14B···Cg4 <sup>ix</sup>  | 2.97                | 2.86                          | 16.1       | 3.83   | 146      |
| <b>8</b>  | C8A–H8A···Cg1 <sup>x</sup>    | 2.75                | 2.74                          | 3.2        | 3.54   | 142      |
| <b>9</b>  | C8A–H8A···Cg1 <sup>xi</sup>   | 2.66                | 2.63                          | 8.6        | 3.56   | 160      |
|           | C14–H14B···Cg4 <sup>xii</sup> | 2.99                | 2.84                          | 18.3       | 3.78   | 138      |
|           | C15–H15B···Cg2                | 2.99                | 2.87                          | 15.9       | 3.72   | 132      |
| <b>10</b> | C8A–H8A···Cg1 <sup>x</sup>    | 2.74                | 2.70                          | 9.3        | 3.66   | 164      |
|           | C14–H14A···Cg4 <sup>ix</sup>  | 2.80                | 2.74                          | 12.1       | 3.75   | 161      |
| <b>11</b> | C8A–H8A···Cg1 <sup>xiii</sup> | 2.81                | 2.66                          | 18.8       | 3.67   | 151      |
|           | C8B–H8B···Cg3 <sup>iv</sup>   | 2.94                | 2.88                          | 11.5       | 3.72   | 141      |
| <b>12</b> | C8A–H8A···Cg1 <sup>xiv</sup>  | 2.85                | 2.77                          | 13.7       | 3.65   | 143      |
|           | C8A–H8A···Cg2 <sup>vii</sup>  | 2.92                | 2.80                          | 16.4       | 3.72   | 143      |

<sup>a</sup> Ring 1: N1B to C5B; Ring 2: C6A to C11A; Ring 3: N1A to C5A; Ring 4: C6B to C11B.

<sup>b</sup> Cg is the centroid (centre of gravity) of the ring.

<sup>c</sup> perpendicular distance of H to ring plane.

<sup>d</sup>  $\gamma$  is the angle defined by the H···Cg line and the perpendicular H···(ring plane) line.

Symmetry codes: (i) 1+x, 1+y, z; (ii) -x, -y, -z-1; (iii) -x+1, -y-1, -z; (iv) x, y, z+1; (v) -x, -y, -z; (vi) -x-1, -y-1, -z; (vii) x, y, z-1; (viii) -x+2, -y+2, -z+1; (ix) 1+x, y, z; (x) x-1, y+1, z; (xi) x-1, y, z-1; (xii) x-1, y, z; (xiii) -x+1, -y+2, -z+2; (xiv) -x, -y, -z.
